# Supplementary material for: Biological effects of exposure to static electric fields in humans and vertebrates: a systematic review
Source: PubMed Central journal article supplement (PMC5393013; doi:10.1186/s12940-017-0248-y), 2017-04-17
Supplement: 12940_2017_248_MOESM1_ESM.pdf [file 12940_2017_248_MOESM1_ESM.pdf]

## **ADDITIONAL MATERIAL**

### **Biological effects of exposure to static EF in humans and vertebrates: A systematic review**

Anne-Kathrin Petri, Kristina Schmiedchen, Dominik Stunder, Dagmar Dechent, Thomas Kraus, William H. Bailey, Sarah Driessen

## Literature search strategy

The literature search can be repeated using the following link:

<https://www.emf-portal.org/en/article/search/results?keywords=%22static+electric+field%22&logicalOperator=0&authors=&journals=&years=&topics%5B%5D=0&topics%5B%5D=1&topics%5B%5D=2&topics%5B%5D=3&topics%5B%5D=4&topics%5B%5D=5&topics%5B%5D=6&topics%5B%5D=7&topics%5B%5D=8&topics%5B%5D=9&frequencyRanges%5B%5D=0&frequencyRanges%5B%5D=1&frequencyRanges%5B%5D=2&frequencyRanges%5B%5D=3&frequencyRanges%5B%5D=4&timeSpan=0>

| <b>Table S1: Schematic overview for placement of individual human and animal studies in study quality categories (1<sup>st</sup> tier, 2<sup>nd</sup> tier, 3<sup>rd</sup> tier).</b> Adapted from the approach recommended by the National Toxicology Program's Office of Health Assessment and Translation (2015) <sup>1</sup> . “++” definitely low risk of bias, “+” probably low risk of bias, “-” probably high risk of bias, “--” definitely high risk of bias |                                                                                                                                                                                 |                                   |                            |                               |                              |                        |                                   |          |                          |                       |                         |   |
|-----------------------------------------------------------------------------------------------------------------------------------------------------------------------------------------------------------------------------------------------------------------------------------------------------------------------------------------------------------------------------------------------------------------------------------------------------------------------|---------------------------------------------------------------------------------------------------------------------------------------------------------------------------------|-----------------------------------|----------------------------|-------------------------------|------------------------------|------------------------|-----------------------------------|----------|--------------------------|-----------------------|-------------------------|---|
| Category                                                                                                                                                                                                                                                                                                                                                                                                                                                              | Guidance                                                                                                                                                                        | Risk of bias criteria             |                            |                               |                              |                        |                                   |          |                          |                       |                         |   |
|                                                                                                                                                                                                                                                                                                                                                                                                                                                                       |                                                                                                                                                                                 | Key criteria                      |                            |                               | Other criteria               |                        |                                   |          |                          |                       |                         |   |
|                                                                                                                                                                                                                                                                                                                                                                                                                                                                       |                                                                                                                                                                                 | Control for confounding variables | Confidence in the exposure | Confidence outcome assessment | Randomization exposure level | Allocation concealment | Identical experimental conditions | Blinding | Attrition/exclusion rate | All outcomes reported | Other potential threats |   |
| 1 <sup>st</sup> tier                                                                                                                                                                                                                                                                                                                                                                                                                                                  | “definitely low” or “probably low” risk of bias for all key risk of bias criteria<br>AND<br>“definitely low” or “probably low” risk of bias for > 50% of all other criteria     | Example 1                         | ++                         | ++                            | +                            | +                      | -                                 | ++       | -                        | ++                    | +                       | + |
|                                                                                                                                                                                                                                                                                                                                                                                                                                                                       |                                                                                                                                                                                 | Example 2                         | ++                         | -                             | ++                           | +                      | -                                 | +        | -                        | +                     | ++                      | - |
| 2 <sup>nd</sup> tier                                                                                                                                                                                                                                                                                                                                                                                                                                                  | study does not meet criteria for tier 1 or tier 3                                                                                                                               | Example 3                         | +                          | -                             | -                            | -                      | -                                 | ++       | ++                       | --                    | +                       | + |
|                                                                                                                                                                                                                                                                                                                                                                                                                                                                       |                                                                                                                                                                                 | Example 4                         | -                          | -                             | -                            | +                      | +                                 | ++       | -                        | +                     | -                       | + |
|                                                                                                                                                                                                                                                                                                                                                                                                                                                                       |                                                                                                                                                                                 | Example 5                         | --                         | -                             | -                            | -                      | +                                 | --       | -                        | +                     | -                       | - |
| 3 <sup>rd</sup> tier                                                                                                                                                                                                                                                                                                                                                                                                                                                  | “probably high” or “definitely high” risk of bias for all key risk of bias criteria<br>AND<br>“probably high” or “definitely high” risk of bias for > 50% of all other criteria | Example 5                         | --                         | -                             | -                            | -                      | +                                 | --       | -                        | +                     | -                       | - |
|                                                                                                                                                                                                                                                                                                                                                                                                                                                                       |                                                                                                                                                                                 |                                   |                            |                               |                              |                        |                                   |          |                          |                       |                         |   |

<sup>1</sup> National Toxicology Program. Handbook for Conducting a Literature-Based Health Assessment Using OHAT Approach for Systematic Review and Evidence Integration. Office of Health Assessment and Translation; 2015. <http://ntp.niehs.nih.gov/go/38673>
